# Supplementary material
Source: PubMed Central journal article supplement (PMC3677970)
Supplement: NIHMS468563-supplement-supp_data.pdf [file NIHMS468563-supplement-supp_data.pdf]

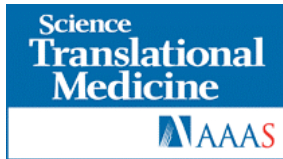

www.sciencetranslationalmedicine.org/cgi/content/full/2/40/40cm21/DC1

## Supplementary Materials for

### **The Demographic and Biomedical Case for Late-Life Interventions in Aging**

Michael J. Rae, Robert N. Butler, Judith Campisi, Aubrey D. N. J. de Grey, Caleb E. Finch, Michael Gough, George M. Martin, Jan Vijg, Kevin M. Perrott, Barbara J. Logan\*

\*Corresponding author. E-mail: [barbara.logan@lifestarinstitute.org](mailto:barbara.logan@lifestarinstitute.org)

Published 14 July 2010, *Sci. Transl. Med.* **2**, 40cm21 (2010)  
DOI: 10.1126/scitranslmed.3000822

#### **This PDF file includes:**

Supplementary Text  
References

# Supporting Online Material

## Age Changes Targeted for Intervention

**Loss of Proliferative Homeostasis:** embraces age-related hyperplasia (including excessive proliferation of osteoclasts, interstitial fibrosis, and, above all, cancer), loss of tissue renewal through stem cell attrition [due, e.g., to cellular senescence, apoptosis (1)] or atrophy {from systemic endocrinological and signaling changes [e.g., (2)]}, as well as aberrant differentiation (e.g., accumulation of mesenchymal adipocyte-like cells in aged tissues, incomplete myocyte development in skeletal muscle, osteoblast-like differentiation of calcifying vascular smooth muscle cells, adipogenic transformation of thymic stromal cells in thymic involution, etc).

**Neurodegeneration:** including but not limited to age-related neurological diseases such as Parkinson's and Alzheimer's diseases, as well as aging changes not normally classified as specific diseases: neuronal loss, synaptic atrophy, loss of synaptic plasticity, loss of interneuronal and intracerebral connectivity, dendritic spine pathology, simplification of neuronal cell geometry, age-related peripheral and autonomic neuropathy, and (arguably) cerebrovascular lipohyalinosis.

**Somatic Mutations:** occur with aging in both nuclear and mitochondrial DNA. Somatic nuclear mutations are essential to age-related cancers and possibly other age-related dysfunction; mitochondrial mutations (especially deletions) accumulate with aging in postmitotic cells, and appear to contribute to age-related disease (Parkinson's disease, sarcopenia, possibly type II diabetes and congestive heart failure) and rising oxidative stress (3, 4). Other mitochondrial structural and functional alterations also appear to

occur, although cause and effect, adaption vs. dysfunction, functional importance, and other uncertainties remain (5).

**Nonadaptive Changes in Gene Expression:** increasing variability in gene expression with aging that does not support homeostasis in a changed local or systemic milieu. Includes epimutations and epigenetic drift (6), which may be initially adaptive, by allowing for metabolic flexibility or adaptability, but become progressively deleterious.

**Immunosenescence:** age-related reductions in adaptive (and possibly humoral) immunity, and alterations in innate immunity associated with thymic involution and alterations in T-cells (7); also heretofore little-understood increases in autoantibodies and alterations in innate immunity (8). Immunosenescence underlies the dramatic increase in morbidity and mortality from infectious disease with age.

**Nonadaptive Inflammation:** elevations in inflammatory cytokines (notably interleukin-6) and acute-phase reactants (especially C-reactive protein) occur, associated with several age-related diseases, increased frailty, and mortality (9). While anti-inflammatory therapies may prove useful, research should center on developing therapies for the primary cause(s), such as impaired cell-mediated immunity, persistent pathogen infection, oxidative stress, imperfectly-healed injuries, accumulation of senescent cells and adipose tissue macrophages (ATMs) (10), age-related autoimmunity, and possibly impaired target-cell response.

**Alterations of the Extracellular Milieu:** include thickening of basement membranes, degradation of tight junctions, accumulation of amyloids, crosslinking of long-lived structural proteins by advanced glycation endproducts (AGE), proteoglycan alterations, degradation of tissue elastin structure (11), and mechanical/structural breakdown (12).

May include chronic shifts in signaling milieu, although these are expected to be secondary to primary age changes and revert upon remediation.

### **References for Supporting Online Materials**

1. J. Campisi, J. Sedivy, How does proliferative homeostasis change with age? What causes it and how does it contribute to aging? *J. Gerontol. A Biol. Sci. Med. Sci.* 64, 164-6 (2009).
2. I. M. Conboy, M. J. Conboy, A. J. Wagers, E. R. Girma, I. L. Weissman, T. A. Rando, Rejuvenation of aged progenitor cells by exposure to a young systemic environment. *Nature.* 433, 760-4 (2005).
3. A. D. N. J. de Grey, *The mitochondrial free radical theory of aging* (Landes Bioscience, Austin, TX, 1999).
4. R. M. Smigrodzki , S. M. Khan, Mitochondrial microheteroplasmy and a theory of aging and age-related disease. *Rejuvenation Res.* 8,172-98 (2005).
5. H. Van Remmen, D. P. Jones, Current thoughts on the role of mitochondria and free radicals in the biology of aging. *J. Gerontol. A Biol. Sci. Med. Sci.* 64,171-4 (2009).
6. G. M. Martin, Epigenetic gambling and epigenetic drift as an antagonistic pleiotropic mechanism of aging. *Aging Cell.* 8, 761-4 (2009).
7. J. Nikolich-Zugich, Ageing and life-long maintenance of T-cell subsets in the face of latent persistent infections. *Nat. Rev. Immunol.* 8, 512-22 (2008).
8. S. L. Swain, J. Nikolich-Zugich, Key research opportunities in immune system aging. *J. Gerontol. A Biol. Sci. Med. Sci.* 64,183-6 (2009).

9. H. J. Cohen, In search of the underlying mechanisms of frailty. *J. Gerontol. A Biol. Sci. Med. Sci.* 55, M706-8 (2000).
10. J. N. Fain, Release of interleukins and other inflammatory cytokines by human adipose tissue is enhanced in obesity and primarily due to the nonfat cells. *Vitam. Horm.* 74,443-77 (2006).
11. M. J. Sherratt, Tissue elasticity and the ageing elastic fibre. *Age (Dordr). Papers in Press*, published 9 July 2009 as DOI:10.1007/s11357-009-9103-6
12. A. J. Freemont, J. A. Hoyland, Morphology, mechanisms and pathology of musculoskeletal ageing. *J. Pathol.* 211, 252-9 (2007).

### **Additional References**

- E. R. Adams, V. G. Nolan, S. L. Andersen, T. T. Perls, D. F. Terry, Centenarian offspring: start healthier and stay healthier. *J Am Geriatr Soc* 56, 2089-92 (2008).
- B. Alemayehu, K. E. Warner , The lifetime distribution of health care costs. *Health Serv Res.* 39, 627-42 (2004).
- A. M. Bernstein, B. J. Willcox, H. Tamaki , N. Kunishima, M. Suzuki, D. C. Willcox, J. S. Yoo, T. T. Perls, First autopsy study of an Okinawan centenarian: absence of many age-related diseases. *J Gerontol A Biol Sci Med Sci.* 59, 1195-9 (2004).
- R. J. Colman, R. M. Anderson, S. C. Johnson, E. K. Kastman, K. J. Kosmatka, T. M. Beasley, D. B. Allison, C. Cruzen, H. A. Simmons, J. W. Kemnitz, R. Weindruch, Caloric restriction delays disease onset and mortality in rhesus monkeys. *Science* 325, 201-4 (2009).

S. Ellouze, S. Augustin, A. Bouaita, C. Bonnet, M. Simonutti, V. Forster, S. Picaud, J. A. Sahel, M. Corral-Debrinski M, Optimized allotopic expression of the human mitochondrial ND4 prevents blindness in a rat model of mitochondrial dysfunction. *Am J Hum Genet*, 83, 373-87 (2008).

R. Hitt, Y. Young-Xu, M. Silver, T. T. Perls, Centenarians: the older you get, the healthier you have been. *Lancet* 354, 652 (1999).

Y. Ikeno, R. T. Bronson, G. B. Hubbard, S. Lee, A. Bartke, Delayed occurrence of fatal neoplastic diseases in ames dwarf mice: correlation to extended longevity. *J Gerontol A Biol Sci Med Sci*. 58, 91-6 (2003).

Y. Ikeno, G. B. Hubbard, S. Lee, L. A. Cortez, C. M. Lew, C. R. Webb, D. E. Berryman, E. O. List, J. J. Kopchick, A. Bartke, Reduced incidence and delayed occurrence of fatal neoplastic diseases in growth hormone receptor/binding protein knockout mice. *J Gerontol A Biol Sci Med Sci*. 64, 522-9 (2009).

S. J. Kovács, A. A. Ehsani, S. Klein, L. Fontana, T. E. Meyer, S. Klein, J. O. Holloszy, Long-term calorie restriction is highly effective in reducing the risk for atherosclerosis in humans. *Proc Natl Acad Sci U. S. A.* 101, 6659-63 (2004).

C. A. Lemere, E. Masliah, Can Alzheimer disease be prevented by amyloid-beta immunotherapy? *Nat Rev Neurol*. 6, 108-19 (2010).

K. G. Manton, G. R. Lowrimore, A. D. Ullian, X. Gu, H. D. Tolley, Labor force participation and human capital increases in an aging population and implications for U.S. research investment. *Proc. Natl. Acad. Sci. U. S. A.* 104,10802-7 (2007).

T. E. Meyer, S. J. Kovács, A. A. Ehsani, S. Klein, J. O. Holloszy, L. Fontana, Long-term caloric restriction ameliorates the decline in diastolic function in humans. *J Am Coll Cardiol.* 47, 398-402 (2006).

R. A. Miller, Extending life: scientific prospects and political obstacles. *Milbank Q.* 80,155-74 (2002).

OECD, Society at a Glance 2006: OECD Social Indicators (OECD Publishing, Paris, 2007).

T. T. Perls, D. Terry, Understanding the determinants of exceptional longevity. *Ann. Intern. Med.* 139, 445-9 (2003).

T. T. Perls, J. Wilmoth, R. Levenson, M. Drinkwater, M. Cohen, H. Bogan, E. Joyce, S. Brewster, L. Kunkel L, A. Puca, Life-long sustained mortality advantage of siblings of centenarians. *Proc Natl Acad Sci U. S. A.* 99, 8442-7 (2002).

Sood A, Aron DC, Glycemic Control in Older Adults: Applying Recent Evidence to Clinical Practice. *Geriatrics Aging.* 12, 130-4 (2009).

A. Tomás-Loba, I. Flores, P. J. Fernández-Marcos, M. L. Cayuela, A. Maraver, A. Tejera, C. Borrás, A. Matheu, P. Klatt, J. M. Flores, J. Viña, M. Serrano, M. A. Blasco, Telomerase reverse transcriptase delays aging in cancer-resistant mice. *Cell* 135, 609-22 (2008).

M. Vergara, M. Smith-Wheelock, J. M. Harper, R. Sigler, R. A. Miller, Hormone-treated Snell dwarf mice regain fertility but remain long lived and disease resistant. *J Gerontol A Biol Sci Med Sci.* 59, 1244-50 (2004).

J. Vijg , J Campisi, Puzzles, promises and a cure for ageing. *Nature* 454, 1065-71 (2008).

U. M. Vischer, M. E. Safar, H. Safar, P. Iaria, K. Le Dudal, O. Henry, F. R. Herrmann, P. Ducimetière, J. Blacher . Cardiometabolic determinants of mortality in a geriatric

population: is there a "reverse metabolic syndrome"? *Diabetes Metab.* 35,108-14 (2009).

R.L. Walford, S. Harris, R. Weindruch, Dietary restriction and aging: historical phases, mechanisms, current directions. *J. Nutr.* 117, 1650-1654 (1987).

R. L. Walford, D. Mock, R. Verdery, T. MacCallum, Calorie restriction in biosphere 2: alterations in physiologic, hematologic, hormonal, and biochemical parameters in humans restricted for a 2-year period. *J Gerontol A Biol Sci Med Sci.* 57, B211-24 (2002).
